# Supplementary material for: PolyRL: reinforcement learning-guided polymer generation for multi-objective polymer discovery
Source: Royal Society of Chemistry journal article supplement (doi:10.1039/d5dd00272a), 2025-11-25
Supplement: d5dd00272a1.pdf [file d5dd00272a1.pdf]

## Supporting Information

# **PolyRL: Reinforcement Learning-Guided Polymer Generation for Multi-Objective Polymer Discovery**

Wentao Li,<sup>§, a</sup> Yijun Li,<sup>§, b</sup> Qi Lei,<sup>§, a</sup> Zemeng Wang,<sup>a</sup> Xiaonan Wang\*,<sup>a</sup>

<sup>a</sup> Department of Chemical Engineering, Tsinghua University, Beijing 100084, P. R.  
China

<sup>b</sup> Tanwei College, Tsinghua University, Beijing 100084, P. R. China

<sup>§</sup> These authors contributed equally to this paper

Corresponding Authors: Xiaonan Wang, wangxiaonan@tsinghua.edu.cn

Summary: 37 Pages, 17 Tables, 19 Figures

30  
31  
32  
33  
34  
35  
36  
37  
38  
39  
40  
41  
42  
43  
44  
45  
46  
47  
48  
49  
50  
51  
52  
53  
54  
55

# List of Supporting Information

## Catalog

|                                                                                    |    |
|------------------------------------------------------------------------------------|----|
| 1 .Experimental Workflow and System Overview .....                                 | 3  |
| 2 Methods and Modules .....                                                        | 4  |
| 2.1 Datasets and Preprocessing .....                                               | 4  |
| 2.2 Property Prediction Models.....                                                | 7  |
| 2.3 Generative Model Pretraining .....                                             | 10 |
| 2.3.1 GPT2 .....                                                                   | 10 |
| 2.3.2 LLaMA2.....                                                                  | 13 |
| 2.3.3 GRU .....                                                                    | 16 |
| 2.3.4 LSTM .....                                                                   | 18 |
| 2.4 Reinforcement Learning Framework .....                                         | 20 |
| 2.4.1 Reward Function Construction .....                                           | 20 |
| 2.4.2 Reinforcement Learning Algorithms <sup>6</sup> .....                         | 21 |
| 2.4.3 Reinforcement Learning Performance Comparison.....                           | 31 |
| 3 Results Analysis .....                                                           | 33 |
| 3.1 Efficiency and Molecular Visualization.....                                    | 33 |
| 3.2 SHAP Analysis.....                                                             | 34 |
| 3.2.1 Method .....                                                                 | 34 |
| 3.2.2 Result.....                                                                  | 36 |
| 3.3 Molecular Dynamics Simulation Setting .....                                    | 37 |
| 3.4 Evaluation of Generated Polymers via Molecular Dynamics Simulation .....       | 40 |
| 3.5 Benchmarking the Molecular Dynamics Simulation with Experimental Dataset ..... | 40 |

## 1. Experimental Workflow and System Overview

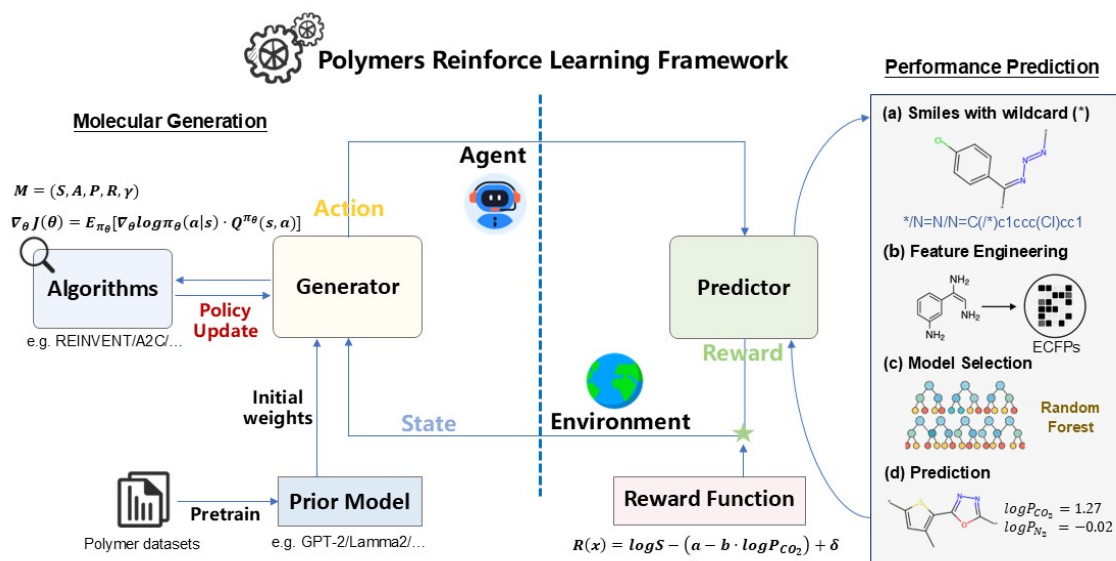

Figure S1. PolyRL framework

This study aims to achieve multi-objective performance-directed optimization of polymer materials for gas separation, specifically targeting the simultaneous enhancement of CO<sub>2</sub> permeability and CO<sub>2</sub>/N<sub>2</sub> selectivity. To this end, we developed a closed-loop material design framework that incorporates reinforcement learning, enabling the iterative generation of high-performance molecular structures.

The PolyRL framework consists of the following three core modules:

**Property prediction models:** Machine learning-based models are used to predict gas separation properties (e.g., CO<sub>2</sub> and N<sub>2</sub> permeability) from polymer structures. These models serve as surrogate reward functions during reinforcement learning to guide the optimization of molecular structures.

**Polymer generative models:** Deep generative models—including GRU, LSTM, GPT-2, and LLaMA2—are pretrained on polymer SMILES sequences to learn their syntactic patterns and are used to generate new candidate molecules.

**Reinforcement learning algorithms and optimization:** The pretrained generative models are fine-tuned as policy networks under the guidance of reinforcement learning algorithms (e.g., REINVENT, REINFORCE, AHC), to improve the target performance of the generated polymers.

77 After training, molecular dynamics (MD) simulations are used to validate the  
78 structural stability and separation performance of the generated molecules.

79 Together, these modules form a closed-loop system encompassing “prediction–  
80 generation–optimization–validation”, offering a scalable design paradigm for the  
81 efficient discovery of gas separation polymers.

## 82 2 Methods and Modules

### 83 2.1 Datasets and Preprocessing

84 To construct a robust reinforcement learning–driven framework for polymer  
85 design, we prepared two main datasets: one for training the property prediction model,  
86 and another for pretraining the generative model.

87

#### 88 (1) Property Prediction Dataset

89 The dataset used for property prediction is primarily derived from the work of Yang  
90 et al.,<sup>1</sup> which compiles experimentally measured gas permeabilities of various polymer  
91 membranes, particularly for CO<sub>2</sub>/N<sub>2</sub> separation. The original data undergo manual  
92 curation to remove duplicate entries and records with incomplete information. After  
93 cleaning, the dataset contains a total of 353 unique polymer samples, each with recorded  
94 CO<sub>2</sub> and N<sub>2</sub> permeability values.

95 All polymer structures are represented using P-SMILES (Polymer SMILES), a  
96 linear string format specifically designed to encode repeating units of polymers. Unlike  
97 conventional SMILES, P-SMILES uses one or more asterisks (\*) to denote the  
98 boundaries of repeating units, enabling explicit representation of linear polymers (e.g.,  
99 [\*]...[\*]) and ladder-like structures. This representation is particularly suitable for  
100 language model–based molecular generation and downstream property prediction  
101 tasks. The dataset is randomly split into a training set (80%, 282 samples) and a test set  
102 (20%, 71 samples) for model development.

103 Table S1. Count of each atom type present in prediction dataset.

| C | O | * | F | N | Si |
|---|---|---|---|---|----|
|---|---|---|---|---|----|

|       |          |           |           |          |     |    |
|-------|----------|-----------|-----------|----------|-----|----|
| Count | 8086     | 991       | 762       | 425      | 335 | 62 |
|       | <b>S</b> | <b>Cl</b> | <b>Br</b> | <b>P</b> |     |    |
| Count | 44       | 26        | 12        | 11       |     |    |

104

105 To further understand the chemical diversity and feature composition of the  
 106 experimental dataset, we performed an analysis of functional group occurrences and  
 107 molecular representation patterns.

108 Functional groups were identified using SMARTS pattern matching implemented  
 109 via the RDKit library. A curated list of SMARTS patterns covering common organic  
 110 moieties—such as hydroxyl (–OH), carbonyl (C=O), carboxyl (–COOH), amino (–  
 111 NH<sub>2</sub>), and aromatic rings—was applied to all polymer fragments represented by P-  
 112 SMILES.

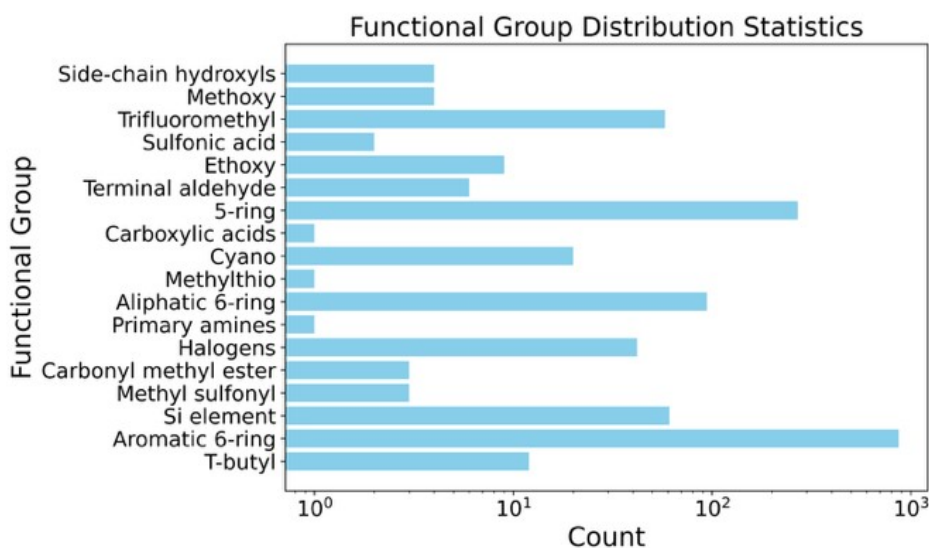

113

114 Figure S2. Functional groups distribution of the experimental dataset

115

116 From the Figure S2, it can be observed that aromatic rings (Aromatic 6-ring), five-  
 117 membered rings (5-ring), and silicon-containing groups (Si element) appear most  
 118 frequently, far exceeding other functional groups. This indicates that the polymers in  
 119 this dataset are predominantly composed of rigid backbones, silicon-containing  
 120 segments, and aromatic structures, which aligns well with the typical design features of  
 121 gas separation membrane materials—high rigidity and steric hindrance contribute to

enhanced size selectivity and anti-swelling performance. In addition, carboxylic acids, carbonyl methyl esters, ethers (Ethoxy/Methoxy), and primary amines are also present to a noticeable extent. These polar functional groups are often employed to tune the interactions between polymer matrices and gas molecules, thereby influencing both permeability and selectivity of the membranes.

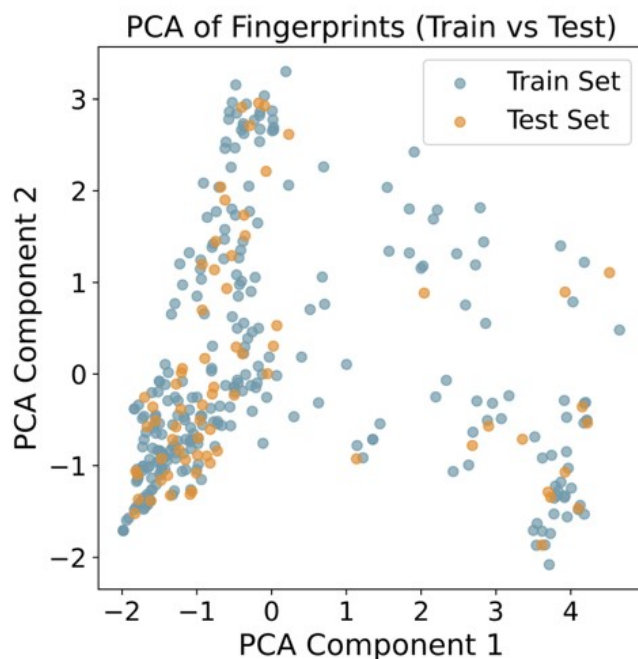

Figure S3. PCA of P-SMILES fingerprints in the experimental dataset

To assess structural diversity and feature clustering, the P-SMILES fingerprints were embedded into a low-dimensional space using Principal Component Analysis (PCA). As shown in Figure S3, the training and test data exhibit a partially uniform distribution in the projection space, indicating that the experimental dataset covers a diverse and well-balanced chemical space.

## (2) Generative Model Pretraining Corpus

The pretraining corpus for the polymer generative model is constructed based on known polymer structures collected from the publicly available PoLyInfo database. First, polymer repeating units with well-defined structures and standardized annotations are extracted from PoLyInfo and converted into canonical SMILES representations. A recurrent neural network (RNN) is then trained on these sequences to learn the structural connectivity patterns and syntactic rules inherent to polymer chemistry.<sup>2</sup>

Based on the trained model, a large number of hypothetical polymer structures are generated via autoregressive sampling. All generated sequences are subsequently converted into P-SMILES format for consistency and structural clarity. This process yields a curated dataset of approximately 995,799 chemically valid polymer sequences. The resulting corpus not only preserves the distribution characteristics of the original chemical space but also densifies underrepresented regions, thereby enhancing the generative model’s ability to learn diverse polymer structures and improving its generalization performance during downstream tasks.

Table S2. Count of each atom type present in generative model pretraining dataset.

|       | <b>C</b>  | <b>O</b>  | <b>*</b>  | <b>N</b>  | <b>F</b> | <b>S</b>  |
|-------|-----------|-----------|-----------|-----------|----------|-----------|
| Count | 20755662  | 3736746   | 1977534   | 1158075   | 506399   | 285990    |
|       | <b>Si</b> | <b>Cl</b> | <b>P</b>  | <b>Br</b> | <b>H</b> | <b>Na</b> |
| Count | 128670    | 72755     | 38694     | 34130     | 14831    | 5365      |
|       | <b>I</b>  | <b>Se</b> | <b>Sn</b> | <b>Ge</b> | <b>B</b> | <b>Fe</b> |
| Count | 5123      | 3563      | 2339      | 2018      | 1264     | 585       |
|       | <b>As</b> | <b>Zn</b> | <b>Ca</b> | <b>Pb</b> | <b>K</b> | <b>Ni</b> |
| Count | 381       | 205       | 142       | 107       | 90       | 78        |
|       | <b>Cd</b> | <b>Te</b> | <b>Co</b> |           |          |           |
| Count | 68        | 67        | 49        |           |          |           |

## 2.2 Property Prediction Models

This study develops a property prediction model based on the Random Forest (RF) algorithm to estimate the gas permeabilities of polymers for CO<sub>2</sub> and N<sub>2</sub> (expressed as log-scale values). The resulting model is subsequently embedded within the reinforcement learning framework as a surrogate reward function (Section 2.4.1).

### Model Architecture and Hyperparameters

The Random Forest model is implemented using the following hyperparameter

159 settings: number of trees = 200 ( $n\_estimators = 200$ ), maximum depth = 20 ( $max\_depth$   
160 = 20), maximum number of features per split set to the square root of the total  
161 ( $max\_features = "sqrt"$ ), and bootstrap sampling enabled ( $bootstrap = True$ ). The default  
162 Gini impurity is used as the splitting criterion, and mean squared error (MSE) is  
163 employed for node evaluation during regression.

164

## 165 **Molecular Fingerprints and Input Features**

166 To encode the structural features of polymers, we compute Morgan fingerprints  
167 from the P-SMILES representations of repeating units using the RDKit toolkit.<sup>3,4,5</sup> The  
168 fingerprint radius is set to 3, capturing atom environments up to three bonds away. The  
169 initial fingerprint space includes 3209 unique substructures, from which we retain the  
170 114 most frequently occurring substructures as final input features. This produces a  
171 sparse yet information-rich feature matrix. Compared to using full-length fingerprints,  
172 this selection strategy significantly reduces model complexity and mitigates overfitting  
173 while preserving the most informative structural patterns for gas permeability  
174 prediction.

175

## 176 **Data Splitting and Normalization**

177 Both input features and target values are standardized prior to training. The full  
178 dataset is randomly split into training and test sets in an 80:20 ratio, and model  
179 performance is independently evaluated on the test set.

180

## 181 **Evaluation Metrics and Formulas**

182 To comprehensively evaluate the model, we adopt the following four standard  
183 regression metrics:

184 **Coefficient of Determination ( $R^2$ ):** measures the proportion of variance in the  
185 observed data that is explained by the model. It indicates the goodness-of-fit of the  
186 regression model, with a value of 1 representing perfect prediction and 0 indicating no  
187 predictive power beyond the mean.



$$R^2 = 1 - \frac{\sum_{i=1}^n (y_i - \hat{y}_i)^2}{\sum_{i=1}^n (y_i - \bar{y})^2}$$

Where:  $y_i$ :the true value  $\hat{y}_i$ :the pricted value

$\bar{y}$ :the mean of all true values  $n$ :the number of samples

**Mean Absolute Error (MAE):** is the average of the absolute differences between the predicted values and the true values. It provides a linear score that penalizes all errors equally.

$$MAE = \frac{1}{n} \sum_{i=1}^n |y_i - \hat{y}_i|$$

**Mean Squared Error (MSE):** measures the average of the squared differences between predicted and actual values. It penalizes larger errors more severely than MAE and is sensitive to outliers.

$$MSE = \frac{1}{n} \sum_{i=1}^n (y_i - \hat{y}_i)^2$$

**Root Mean Squared Error (RMSE):** RMSE is the square root of MSE, which brings the error units back to the original scale of the output. It is a commonly used metric to assess the average magnitude of prediction errors.

$$RMSE = \sqrt{\frac{1}{n} \sum_{i=1}^n (y_i - \hat{y}_i)^2}$$

Table S3. Evaluation metrics of RF model for gas permeability prediction.

| Metric         | Dataset | Target1 (N2) | Target2(CO2) |
|----------------|---------|--------------|--------------|
| R <sup>2</sup> | Train   | 0.8992       | 0.8936       |
| R <sup>2</sup> | Test    | 0.7409       | 0.7535       |

|      |       |        |        |
|------|-------|--------|--------|
| MAE  | Train | 0.3559 | 0.3358 |
| MAE  | Test  | 0.7044 | 0.6245 |
| MSE  | Train | 0.3321 | 0.3095 |
| MSE  | Test  | 0.9761 | 0.7784 |
| RMSE | Train | 0.5762 | 0.5563 |
| RMSE | Test  | 0.9880 | 0.8823 |

---

207

## 208 **2.3 Generative Model Pretraining**

### 209 **2.3.1 GPT2**

#### 210 (a) Model Architecture

211 The generative model is based on the classical GPT-2 autoregressive language  
 212 modeling architecture, with modifications tailored to the structural characteristics of  
 213 polymer representations in the P-SMILES format. The model adopts a decoder-only  
 214 Transformer structure consisting of 24 stacked Transformer blocks, each comprising  
 215 standard subcomponents including multi-head self-attention, feedforward neural  
 216 networks, residual connections, and layer normalization. Each attention layer contains  
 217 16 parallel attention heads, enabling the model to capture long-range dependencies  
 218 between tokens in the polymer sequences. The dimensionality of the hidden layers in  
 219 the feedforward subnetwork is set to 128, serving as the embedding space for individual  
 220 tokens. Compared to the original GPT-2 design, we reduce the embedding size and  
 221 model depth to better match the relatively lower complexity of polymer datasets and to  
 222 improve training stability and efficiency.

223 The model is pretrained in a self-supervised manner on a curated corpus of 100,000  
 224 unique P-SMILES sequences. Each sequence is tokenized using a customized SMILES  
 225 tokenizer and either padded or truncated to a fixed length of 128 tokens. The token  
 226 sequence is first processed through an embedding layer and a positional encoding  
 227 module, followed by the main Transformer body. The final hidden states are projected  
 228 to the vocabulary space through a linear language modeling head to obtain the

229 probability distribution for each token in an autoregressive setting. During training, the  
 230 model maximizes the likelihood of each token conditioned on its preceding context,  
 231 and padding tokens are explicitly excluded from the loss computation. The architecture  
 232 is implemented based on HuggingFace’s GPT2Model and is encapsulated using the  
 233 PyTorch Lightning framework to support scalable fine-tuning and seamless integration  
 234 into downstream reinforcement learning pipelines.

235

236 Table S4. Key hyperparameter settings for GPT-2 model pretraining.

| Parameter                 | Value                  |
|---------------------------|------------------------|
| Max sequence length       | 128 tokens             |
| Number of layers          | 24                     |
| Number of attention heads | 16                     |
| Hidden dimension          | 128                    |
| Vocabulary size           | 63                     |
| Tokenizer                 | SMILESTokenizerEnamine |
| Loss function             | CrossEntropyLoss       |
| Optimizer                 | AdamW                  |
| Learning rate             | $5 \times 10^{-5}$     |
| Batch size                | 64                     |
| Max training epochs       | 50                     |
| Gradient clipping         | 1.0                    |
| Early stopping            | Patience=3             |

237

238 (b) Training Process and Loss Evolution

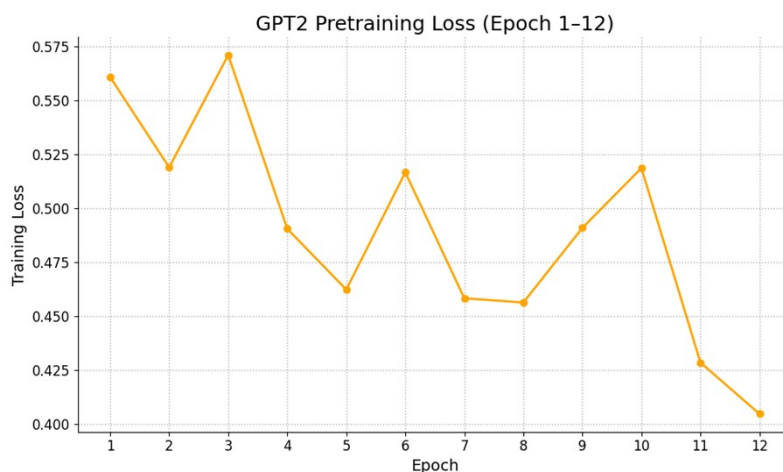

Figure S4. Training loss curve of GPT-2 model during pretraining

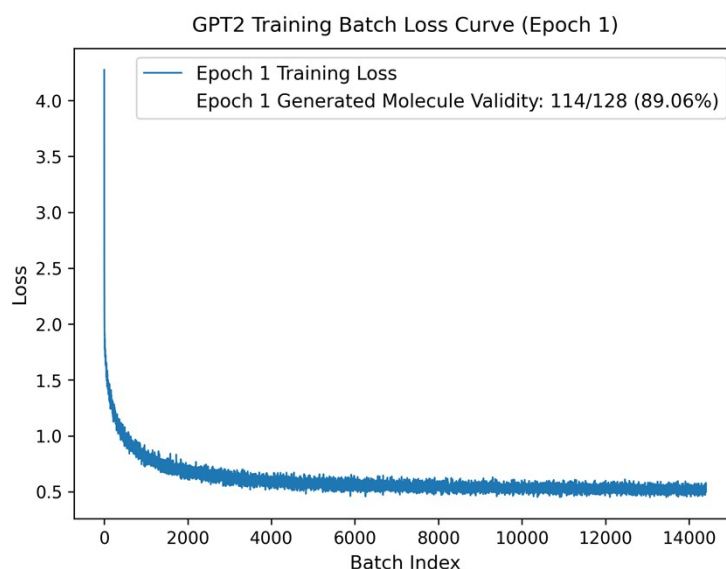

Figure S5. Training batch loss curve of GPT-2 model during the first epoch

Figure S4 illustrates the loss evolution during the training process, which shows an overall decreasing trend, indicating that the model achieves stable convergence. The initial training loss starts at approximately 0.56 and drops to around 0.40 by epoch 12, reflecting a gradual improvement in the model's ability to predict tokens within polymer sequences. Although slight fluctuations are observed at epochs 3 and 6, the loss steadily stabilizes in the later stages. The model reaches its lowest loss values at epochs 11 and 12, suggesting that it has effectively learned the structural patterns embedded in the training corpus. The entire pretraining process takes approximately 240 minutes to complete.

In addition, Figure S5 presents the per-batch loss of the GPT-2 model. It can be

255 observed that the model converges rapidly within the first epoch, with subsequent  
256 epochs showing a further overall decrease in loss. However, this continued reduction  
257 has a slightly impact on the validity or chemical plausibility of the generated polymer  
258 structures, indicating that the generative model does not suffer from underfitting.

### 259 (c) Validity and Examples of Generated Molecules

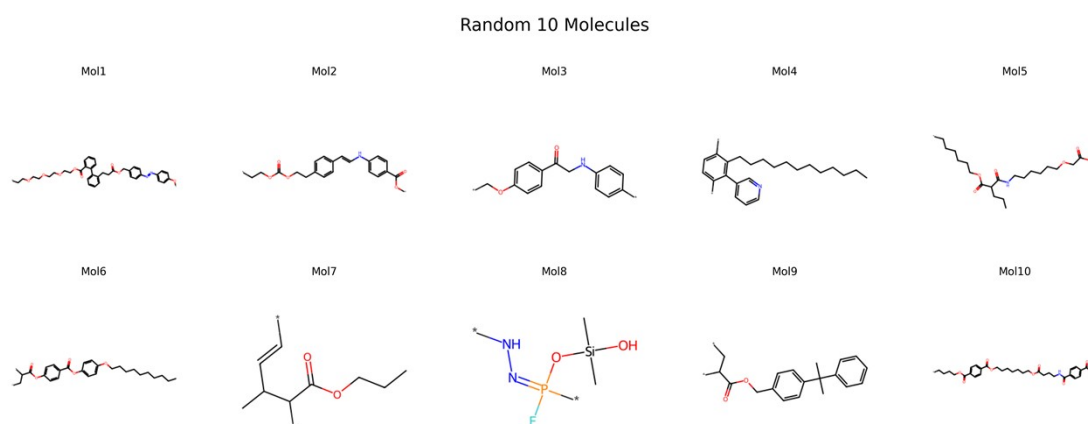

260

261 Figure S6. Representative Molecular Structures Generated by GPT-2

262

263 The pretrained GPT-2 model randomly generates 128 polymer molecules, of which  
264 121 are valid, resulting in a validity rate of 94.53%.

265

### 266 2.3.2 LLaMA2

#### 267 (a) Model Architecture

268 LLaMA2 is a decoder-only Transformer model originally developed for large-scale  
269 language modeling tasks. In this work, we adapt the architecture into a lightweight  
270 configuration consisting of 4 Transformer decoder layers. Each layer includes multi-  
271 head self-attention, a feedforward neural network (FFN), residual connections, and  
272 layer normalization. The number of attention heads is set to 16, and both the embedding  
273 dimension and hidden state size are configured to 320, enabling each token to be  
274 represented in a 320-dimensional semantic space. Compared to the original LLaMA2  
275 design, we reduce the model depth and parameter count to better suit the lower  
276 structural complexity of polymer sequence data and to improve training efficiency and  
277 stability.

278 The input to the model is a polymer molecule represented as a P-SMILES string,  
 279 which is tokenized using a custom SMILES tokenizer and padded or truncated to a  
 280 fixed length of 128 tokens. The token sequence is first processed through an embedding  
 281 layer and positional encoding module, and then passed through the LLaMA2 backbone  
 282 for feature extraction. The final hidden states are projected onto the vocabulary space  
 283 through a linear output layer to produce token-wise probability distributions. Training  
 284 is performed in an autoregressive manner by maximizing the conditional likelihood of  
 285 each token given its preceding context, with padding tokens explicitly excluded from  
 286 the loss calculation. The architecture is implemented using the HuggingFace  
 287 LlamaModel and wrapped with PyTorch Lightning to support scalable fine-tuning and  
 288 integration into downstream reinforcement learning workflows.

289

290 Table S5. Key hyperparameter settings for LLaMA2 model pretraining.

| Parameter                 | Value                  |
|---------------------------|------------------------|
| Max sequence length       | 128 tokens             |
| Number of layers          | 4                      |
| Number of attention heads | 16                     |
| Hidden dimension          | 320                    |
| Vocabulary size           | 63                     |
| Tokenizer                 | SMILESTokenizerEnamine |
| Loss function             | CrossEntropyLoss       |
| Optimizer                 | AdamW                  |
| Learning rate             | $5 \times 10^{-5}$     |
| Batch size                | 64                     |
| Max training epochs       | 50                     |
| Gradient clipping         | 1.0                    |

291

292 (b) Training Process and Loss Evolution

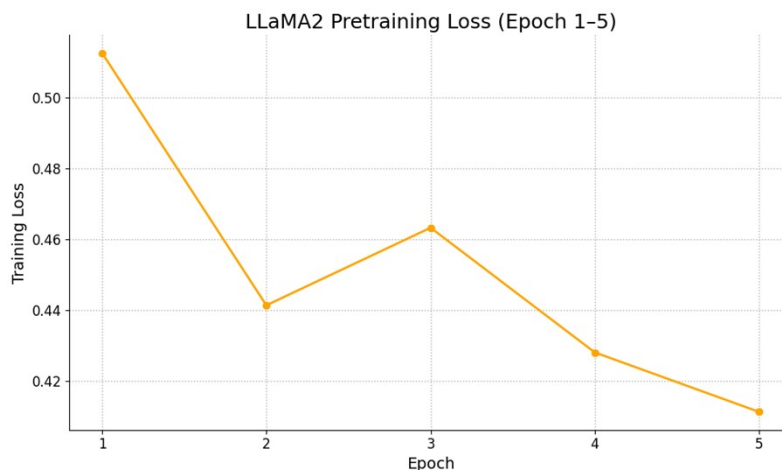

293

294 Figure S7. Training loss curve of LLaMA-2 model during pretraining

295

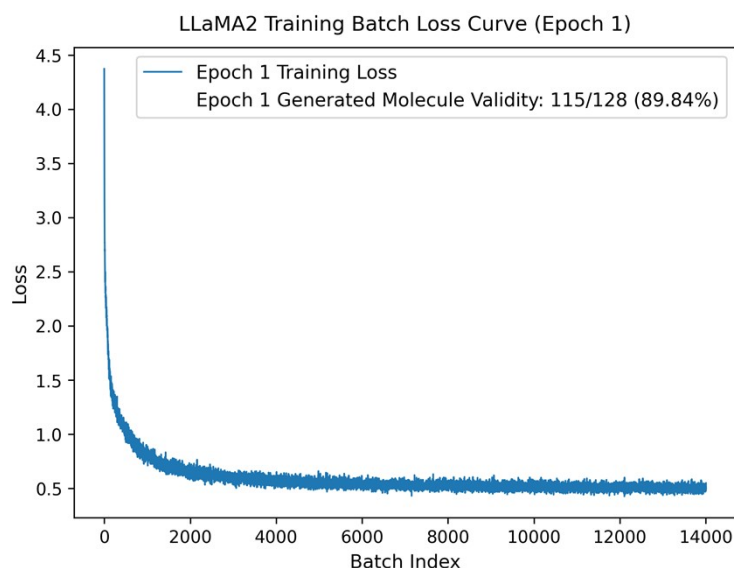

296

297 Figure S8. Training batch loss curve of LLaMA-2 model during the first epoch

298

299 Figure S7 shows the evolution of training loss during the first five epochs of  
300 LLaMA2 pretraining. The model exhibits a consistent downward trend in loss, starting  
301 at approximately 0.53 in epoch 1 and steadily decreasing to around 0.41 by epoch 5.  
302 This decline reflects the model's progressive improvement in predicting token  
303 sequences. A minor increase in loss is observed at epoch 3, likely due to learning  
304 instability or parameter adjustments, but the overall trajectory suggests effective

305 convergence.

306 In addition, Figure S8 presents the per-batch loss of the LLaMA-2 model. It can be  
307 observed that the model converges rapidly within the first epoch, with subsequent  
308 epochs showing a further overall decrease in loss. However, this continued reduction  
309 has a slightly impact on the validity of the generated polymer structures, which is  
310 consistent with the behavior observed in GPT-2, indicating that the generative model  
311 does not suffer from underfitting.

### 312 (c) Validity and Examples of Generated Molecules

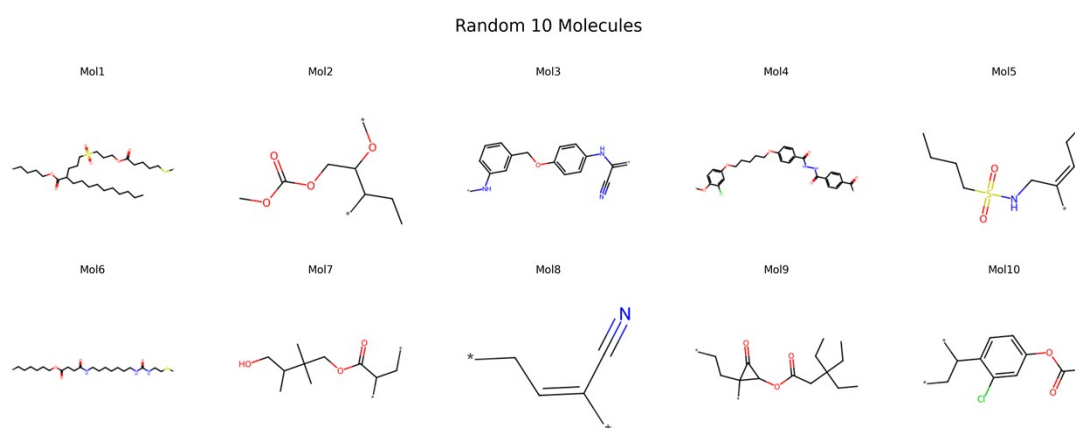

313

314 Figure S9. Representative Molecular Structures Generated by LLaMA-2

315

316 The pretrained LLaMA-2 model randomly generates 128 polymer molecules, of  
317 which 128 are valid, resulting in a validity rate of 100%.

318

### 319 2.3.3 GRU

#### 320 (a) Model Architecture

321 The GRU-based generative model consists of three main components: an  
322 embedding layer, a stacked GRU module, and an output prediction head. Each token in  
323 the input sequence, encoded by the SMILES tokenizer, is first mapped to a 256-  
324 dimensional vector through the embedding layer. The resulting sequence is then fed  
325 into a three-layer GRU network with a hidden state size of 512. Optional dropout and  
326 layer normalization mechanisms are supported to enhance generalization performance.

327 During the self-supervised pretraining phase, the GRU operates in a time-unfolded



mode, recursively updating hidden states at each step to model sequential dependencies. At every time step, the extracted hidden state is passed through a fully connected MLP head to produce a probability distribution over the vocabulary, predicting the next token in an autoregressive manner. The model is trained by maximizing the likelihood of each token conditioned on its preceding context, using cross-entropy loss as the objective function. Padding tokens (<pad>) are explicitly excluded from the loss calculation.

This GRU-based architecture is implemented within the PolyRL framework, which is built on PyTorch and TorchRL. It is designed for modular extensibility and is compatible with reinforcement learning policy interfaces for subsequent fine-tuning and task-specific optimization.

Table S6. Key hyperparameter settings for GRU model pretraining

| Parameter           | Value                             |
|---------------------|-----------------------------------|
| Vocabulary size     | 63                                |
| Tokenizer           | SMILESTokenizerEnamine            |
| Sequence length     | 128 tokens                        |
| Embedding dimension | 256                               |
| GRU hidden size     | 512                               |
| GRU layers          | 3                                 |
| Dropout             | 0.0                               |
| Layer normalization | Disabled                          |
| Optimizer           | Adam                              |
| Learning rate       | 0.001                             |
| LR scheduler        | StepLR (step=500, $\gamma=0.97$ ) |
| Batch size          | 64                                |
| Epochs              | 50                                |

(b) Validity and Examples of Generated Molecules

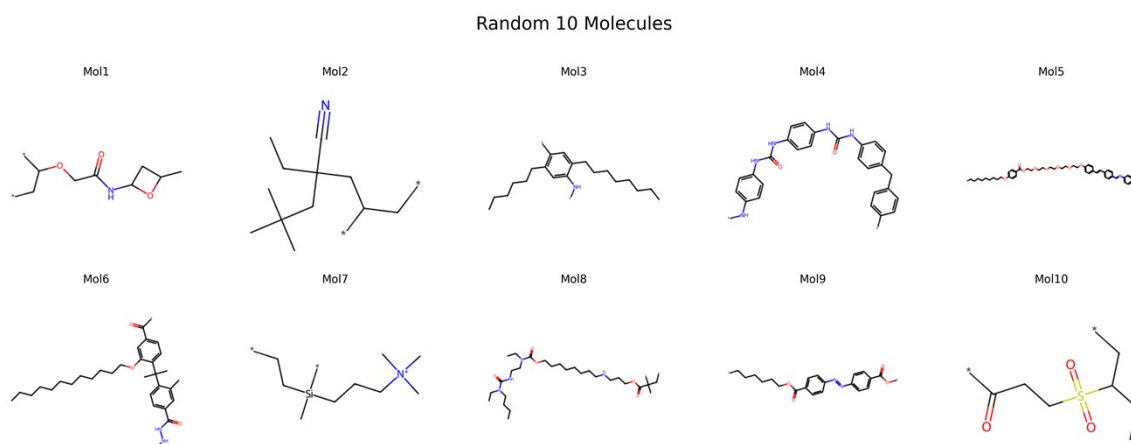

Figure S10. Representative Molecular Structures Generated by GRU

The pretrained GRU model randomly generates 128 polymer molecules, of which 128 are valid, resulting in a validity rate of 100%.

### 2.3.4 LSTM

#### (a) Model Architecture

The generative model is built upon a stacked LSTM (Long Short-Term Memory) architecture, consisting of three primary components: an embedding layer, a multi-layer LSTM network, and an output projection head. The input polymer structure sequences are first tokenized using a customized SMILES tokenizer. Each token is then mapped to a 256-dimensional continuous vector through the embedding layer to capture fundamental semantic representations. The resulting embedded sequence is passed into a three-layer stacked LSTM module with a hidden state size of 512, enabling the model to capture temporal dependencies across sequence steps and enhancing its capacity to model long-range interactions. Optional dropout and layer normalization mechanisms are supported to mitigate overfitting and improve generalization.

During self-supervised pretraining, the LSTM operates in an unfolded time-step mode, recursively updating hidden states and memory cells to predict each token conditioned on its preceding context. At each time step, the hidden state output is passed through a fully connected MLP head, which projects it onto the vocabulary space to generate a probability distribution over the next token. The model is trained in an

364 autoregressive fashion by maximizing the likelihood of each token given its prior  
 365 context. Cross-entropy loss is used as the training objective, with padding tokens  
 366 (<pad>) explicitly excluded from the loss computation.

367 This LSTM model is implemented within the PolyRL framework, built upon  
 368 PyTorch and TorchRL. It is designed for high modularity and extensibility, and can be  
 369 seamlessly integrated into reinforcement learning pipelines as a policy network for  
 370 further optimization in downstream tasks.

371

372 Table S7. Key hyperparameter settings for LSTM model pretraining

| Parameter           | Value                             |
|---------------------|-----------------------------------|
| Vocabulary size     | 63                                |
| Tokenizer           | SMILESTokenizerEnamine            |
| Sequence length     | 128 tokens                        |
| Embedding dimension | 256                               |
| LSTM hidden size    | 512                               |
| LSTM layers         | 3                                 |
| Dropout             | 0.0                               |
| Layer normalization | Disabled                          |
| Optimizer           | Adam                              |
| Learning rate       | 0.001                             |
| LR scheduler        | StepLR (step=500, $\gamma=0.97$ ) |
| Batch size          | 64                                |
| Epochs              | 50                                |

373 (b) Validity and Examples of Generated Molecules

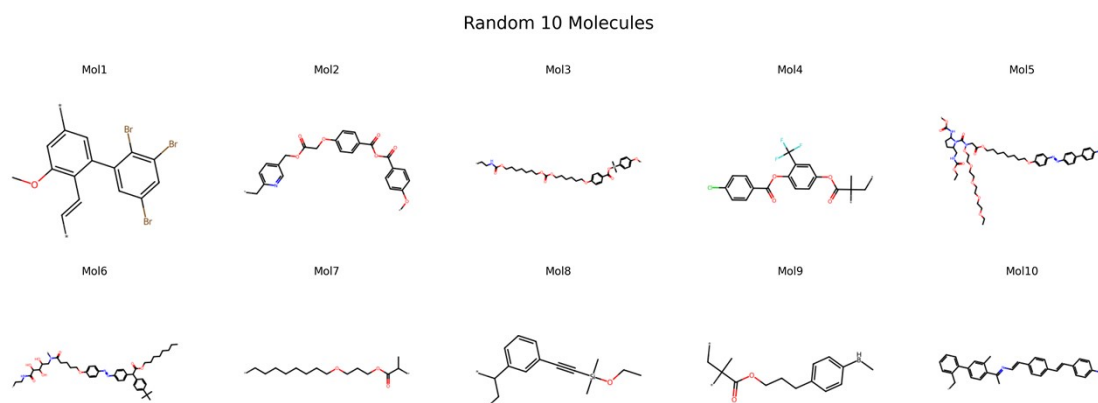

Figure S11. Representative Molecular Structures Generated by LSTM

The pretrained LSTM model randomly generates 128 polymer molecules, of which 126 are valid, resulting in a validity rate of 98.44%.

## 2.4 Reinforcement Learning Framework

### 2.4.1 Reward Function Construction

To effectively guide the generative model in producing high-performance polymer structures during reinforcement learning, we designed a reward function based on a multi-objective prediction model. This reward function evaluates the trade-off between CO<sub>2</sub> permeability and CO<sub>2</sub>/N<sub>2</sub> selectivity of candidate molecules. The core idea is to encourage the generation of structures that surpass the Robeson upper bound on the permeability–selectivity landscape.

The Robeson upper bound is a widely accepted empirical boundary in the field of polymer membrane separation, characterizing the trade-off relationship between permeability (P) and selectivity (S). In most cases, the influence of molecular structure on these two properties is inversely correlated—higher permeability often comes at the cost of lower selectivity, and vice versa. The Robeson upper bound captures this intrinsic trade-off in logarithmic scale and can be formulated as follows:

$$\log_{10}(S_{CO_2/N_2}) = a - b * \log_{10}(P_{CO_2})$$

Where  $a = 2.595$  ,  $b = 0.3464$

To construct a reward function suitable for policy learning, we reformulated the

above equation and defined the extent to which a candidate molecule surpasses the Robeson upper bound as the reward value:

$$Score = \log_{10}(S_{CO_2/N_2}) - (a - b * \log_{10}(P_{CO_2})) + \delta$$

Where  $\delta = 2$  is an empirical offset introduced to prevent the reward from becoming negative or too small, which would hinder gradient propagation in policy optimization.

For invalid SMILES strings that cannot be parsed, a reward of 0 is uniformly assigned to ensure the stability and differentiability of the reward function.

Through this reward design, the reinforcement learning model is able to learn structural patterns that maximize gas separation performance during molecular generation, enabling performance-driven exploration of the polymer design space.

## 2.4.2 Reinforcement Learning Algorithms<sup>6</sup>

### (a) REINFORCE

REINFORCE (REward Increment = Nonnegative Factor  $\times$  Offset Reinforcement  $\times$  Characteristic Eligibility) is a classical policy gradient method. Its core idea is to directly optimize the probability distribution of high-performance molecular generation by leveraging the reward signals obtained from sampled trajectories. In each training iteration, the agent generates a batch of candidate molecular structures based on its current policy, and their performance is evaluated by a reward function  $R(x)$ . The policy is then updated using the following loss function:

$$L_{reinforce} = -\log \pi_{Agent}(x) * R(x)$$
$$L_{reinforce} = -\sum_{t=1}^T \log \pi_{\theta}(a_t | s_t) * R(x)$$

Where:

$\pi_{Agent}(x)$ : probability of generating molecule  $x$  under the current agent policy.

$R(x)$ : the performance score of molecule  $x$  computed by the reward function;

Action  $a_t$ : the token selected by the generative model at time step  $t$ .

State  $s_t$ : the partial SMILES sequence generated up to time step  $t$ .

424

425 This loss function aims to increase the likelihood of generating high-reward  
 426 molecules, thereby achieving task-directed generative optimization. The gradient is  
 427 estimated following the standard REINFORCE update rule:

428 
$$\nabla_{\theta} E_{x \sim \pi_{\theta}}[R(x)] \approx \nabla_{\theta} \log \pi_{\theta}(x) * R(x)$$

429 To improve training stability and sample efficiency, we incorporate batch-wise  
 430 reward smoothing and optionally enable experience replay, which helps mitigate  
 431 gradient variance caused by noisy reward signals.

432

433 Table S8. Key hyperparameter settings for REINFORCE reinforcement learning

| Parameter          | Value  |
|--------------------|--------|
| Random seed        | 101    |
| Num environments   | 128    |
| Total SMILES       | 20000  |
| Learning rate      | 0.0001 |
| Epsilon            | 1e-08  |
| Weight decay       | 0.0    |
| Experience replay  | True   |
| Replay buffer size | 100    |
| Replay batch size  | 10     |

434

435 (b) REINVENT

436 REINVENT (REINforcement-learned Virtual screening of molecular ENTities) is  
 437 a reinforcement learning method based on the policy gradient framework. Its core idea  
 438 is to use an unsupervised pretrained language model as a prior policy for molecular  
 439 structure generation and to fine-tune the agent policy toward target properties using  
 440 reward signals. This approach allows the model to retain the structural validity encoded

in the prior distribution while optimizing for desired performance characteristics. Rather than directly maximizing the molecular reward, REINVENT constructs a reward-guided log-likelihood objective to update the agent’s policy. Specifically, in each training iteration, the agent generates a batch of candidate molecules, which are scored by a reward function  $R(x)$ . The agent is then updated using the following loss function:

$$L_{reinvent} = (\sigma * R(x) + \log \pi_{Prior}(x) - \log \pi_{Agent}(x))$$

Where:

$\pi_{Prior}(x)$ : probability of generating molecule  $x$  under the prior model.

$\pi_{Agent}(x)$ : probability of generating molecule  $x$  under the current agent model.

$R(x)$ : the performance score of molecule computed by the reward function.

$\sigma$ : a hyperparameter that controls the influence strength of the reward signal during training.

The essence of this loss function is to encourage the agent to generate molecules that not only receive high rewards but also lie within high-probability regions of the prior distribution. In this way, goal-directed optimization is embedded within the structure-aware generative framework, achieving a balance between performance and synthetic feasibility. Compared to directly maximizing the reward or strengthening the generator’s distribution, REINVENT’s reward-augmented log-likelihood minimization strategy helps mitigate issues such as policy degradation and mode collapse, leading to improved training stability and generalization.

Table S9. Key hyperparameter settings for REINVENT reinforcement learning

| Parameter        | Value  |
|------------------|--------|
| Random seed      | 101    |
| Num environments | 128    |
| Total SMILES     | 20000  |
| Learning rate    | 0.0001 |
| Epsilon          | 1e-08  |

|                    |      |
|--------------------|------|
| Weight decay       | 0.0  |
| Sigma              | 120  |
| Experience replay  | True |
| Replay buffer size | 100  |
| Replay batch size  | 10   |

---

463

#### 464 (c) AHC

465 AHC (Augmented Hill-Climb) is a molecular reinforcement learning method that  
 466 combines reward-augmented likelihood optimization with a top-k hill-climbing  
 467 strategy. It builds upon the REINVENT framework by using a pretrained generative  
 468 model as the prior policy and guiding the agent policy toward desired molecular  
 469 properties through a reward function. Unlike REINVENT, which updates the policy  
 470 using all generated samples, AHC selects only the top k% highest-scoring molecules in  
 471 each training batch for policy updates. This enhances learning from high-quality  
 472 samples and reduces gradient noise introduced by low-quality candidates.

473 Specifically, the agent generates a batch of candidate molecules, each evaluated by  
 474 a reward function  $R(x)$ . The molecules are then ranked by reward, and only the top-k  
 475 samples are used to compute the loss. The loss function is formulated as:

$$476 L_{AHC} = (\sigma * R(x) + \log \pi_{Prior}(x) - \log \pi_{Agent}(x))$$

477 Where:

478  $\pi_{Prior}(x)$ : probability of generating molecule  $x$  under the prior model.

479  $\pi_{Agent}(x)$ : probability of generating molecule  $x$  under the current agent model.

480  $R(x)$ : the performance score of molecule computed by the reward function.

481  $\sigma$ : a hyperparameter that controls the influence strength of the reward signal during  
 482 training.

483

484 The objective is to minimize the distance between the agent policy and a reward-  
 485 weighted prior distribution. By introducing the top-k filtering mechanism, AHC



significantly increases the impact of high-performance samples during training and prevents the agent from drifting toward low-quality regions of chemical space. In addition, AHC includes a regularization term to penalize overly high sequence likelihoods, helping to avoid mode collapse and improve training stability. It also supports experience replay, allowing the model to revisit high-reward molecules for enhanced learning. Benefiting from these designs, AHC demonstrates faster convergence and stronger reward guidance in polymer optimization tasks in this study.

Table S10. Key hyperparameter settings for AHC reinforcement learning

| Parameter          | Value  |
|--------------------|--------|
| Random seed        | 101    |
| Num environments   | 128    |
| Total SMILES       | 20000  |
| Learning rate      | 0.0001 |
| Epsilon            | 1e-08  |
| Weight decay       | 0.0    |
| Top-k fraction     | 0.5    |
| Sigma              | 60     |
| Experience replay  | True   |
| Replay buffer size | 100    |
| Replay batch size  | 10     |

(d) A2C

A2C (Advantage Actor-Critic) is a reinforcement learning algorithm that integrates a policy network (actor) and a value network (critic), enabling stable and efficient optimization by reducing the variance of policy gradient estimates through the use of advantage functions.

In each training iteration, the agent generates a batch of candidate molecules using the current policy network, and each molecule is scored using a task-specific reward function  $R(x)$ . The generalized advantage estimation (GAE) method is then applied to compute the advantage value  $A(x)$  for each molecule trajectory, representing how much better the actual return is compared to the expected baseline.

The A2C loss function consists of four components:

$$L_{A2C} = L_{actor} + \beta * L_{critic} - \alpha * L_{entropy} + \lambda * D_{KL}(\pi_{agent} || \pi_{prior})$$

Where:

1)  $L_{actor} = -\log \pi_{agent}(x) * A(x)$  is the actor loss that promotes actions with higher advantages

2)  $L_{critic} = (V(x) - R(x))^2$  is the critic loss that minimizes the mean squared error between the predicted value  $V(x)$  and actual return  $R(x)$

3)  $L_{entropy} = -H[\pi_{agent}(x)]$  is the entropy regularization term that encourages exploration by maximizing the policy's uncertainty..

4)  $D_{KL}(\pi_{agent} || \pi_{prior})$  is the KL divergence between the current agent policy and the pretrained prior policy, used to maintain chemical validity

$x$ : a complete generated molecule (a SMILES string).

$R(x)$ : reward of molecule  $x$  computed from the scoring function.

$A(x)$ : the advantage function, compute using GAE.

$V(x)$ : value estimate of the generated molecule given by the critic network.

$\pi_{Prior}(x)$ : probability of generating molecule  $x$  under the prior model.

$\pi_{Agent}(x)$ : probability of generating molecule  $x$  under the current agent model.

$H[\cdot]$ : Shannon entropy of the probability distribution.

$\alpha, \beta, \lambda$ : hyperparameters controlling the contribution of entropy, critic loss, and KL regularization, respectively.

Owing to the coordinated optimization between the actor and critic networks, A2C effectively reduces variance in policy updates while preserving structural validity. The

introduction of advantage-based learning enhances the directionality of training signals, and the combined use of entropy regularization and KL constraints encourages sufficient exploration and chemical diversity.

532

533 Table S11. Key hyperparameter settings for A2C reinforcement learning

| Parameter                    | Value  |
|------------------------------|--------|
| Random seed                  | 101    |
| Num environments             | 128    |
| Total SMILES                 | 20000  |
| Shared actor-critic networks | False  |
| Learning rate                | 0.0001 |
| Epsilon                      | 1e-06  |
| Weight decay                 | 0.0    |
| Gamma                        | 0.999  |
| GAE lambda                   | 0.99   |
| Critic loss coefficient      | 0.5    |
| Entropy loss coefficient     | 0.1    |
| KL divergence coefficient    | 0.001  |
| Mini-batch size              | 16     |
| Max gradient norm            | 0.5    |

534

#### 535 (e) PPO

PPO (Proximal Policy Optimization) is a policy gradient algorithm based on the trust region concept. It aims to improve policy optimization efficiency while restricting the magnitude of updates, thereby preventing policy collapse or instability. In this study, PPO is employed to optimize molecular generation strategies toward target properties, using clipped surrogate objectives and multi-epoch updates to enhance

541 convergence stability in complex molecular spaces.

542 Similar to A2C, PPO adopts an actor-critic architecture in which the policy network  
543 (actor) and value network (critic) are jointly trained. In each training iteration, the actor  
544 generates a batch of candidate molecules, which are scored using a reward function  
545  $R(x)$ . The Generalized Advantage Estimation method is used to compute the advantage  
546 function  $A(x)$ , reflecting the relative value of each trajectory.

547 The core actor loss in PPO is formulated as a clipped surrogate objective:

548 
$$L_{actor} = -E_x[\min(r(x) * A(x), \text{clip}(r(x), 1 - \epsilon, 1 + \epsilon) * A(x))]$$

549 Where:

- 550 1)  $r(x) = \frac{\pi_{agent}(x)}{\pi_{old}(x)}$  the probability ratio between the current and previous policies  
551 2)  $A(x)$ : the advantage function computed via GAE  
552 3)  $\epsilon$ : the clipping threshold, used to limit excessive policy updates.

553 This clipped objective is designed to restrict the magnitude of policy updates. If  
554 the probability ratio  $r(x)$  deviates too far from 1, the gradient is clipped to ensure  
555 conservative updates. Specifically, the minimum operator ensures that the loss does not  
556 increase when the update would excessively improve the advantage, effectively  
557 bounding the policy improvement within a safe range.

558 In addition to the surrogate loss, the total PPO objective includes three  
559 regularization terms:

560 
$$L_{PPO} = L_{actor} + \beta * L_{critic} - \alpha * L_{entropy} + \lambda * D_{KL}(\pi_{agent} || \pi_{prior})$$

561 Where:

- 562 1)  $L_{critic} = (V(x) - R(x))^2$  minimizes the squared error between predicted and actual  
563 returns.  
564 2)  $L_{entropy} = -H[\pi_{agent}(x)]$  is the entropy regularization term that encourages  
565 exploration by maximizing the policy's uncertainty  
566 3)  $D_{KL}(\pi_{agent} || \pi_{prior})$  is the KL divergence between the current agent policy and the  
567 pretrained prior policy, used to maintain chemical validity

568 To improve sample efficiency, PPO applies multiple optimization epochs over each

569 batch and optionally incorporates prioritized experience replay to expand the training  
 570 dataset. The gradients are clipped to prevent numerical instability caused by overly  
 571 large updates.

572 Table S12. Key hyperparameter settings for PPO reinforcement learning

| Parameter                    | Value   |
|------------------------------|---------|
| Random seed                  | 101     |
| Num environments             | 64      |
| Total SMILES                 | 20000   |
| Shared actor-critic networks | False   |
| Learning rate                | 0.0005  |
| Epsilon                      | 1e-06   |
| Weight decay                 | 1.0e-06 |
| Discount factor (gamma)      | 0.999   |
| GAE lambda                   | 1.0     |
| Critic loss coefficient      | 0.25    |
| Entropy loss coefficient     | 0.1     |
| KL divergence coefficient    | 0.001   |
| PPO clipping threshold       | 0.3     |
| PPO epochs per update        | 3       |
| Max gradient norm            | 0.25    |
| Experience replay            | False   |
| Replay batch size            | 24      |
| Replay buffer size           | 100     |

573

574 (f) DPO

575 Direct Preference Optimization (DPO) is a preference-based reinforcement learning

method that aims to optimize the policy without relying on explicit scalar reward values. Instead, it guides the policy to favor higher-quality samples based on preference comparisons. In this study, DPO is employed to steer the molecular generation policy toward high-performing structures through relative ranking.

During each training iteration, the policy generates a batch of candidate molecules, which are evaluated by the task-specific reward function  $R(x)$ . The molecules are then ranked based on their reward scores, with the top 50% selected as preferred samples ( $x^+$ ) and the bottom 50% as dispreferred samples ( $x^-$ ). These preference pairs are used to compute the DPO loss:

$$L_{DPO} = -\log \sigma \left( \beta * \left[ \log \frac{\pi_{agent}(x^+)}{\pi_{prior}(x^+)} - \log \frac{\pi_{agent}(x^-)}{\pi_{prior}(x^-)} \right] \right)$$

Where:

- 1)  $x^+, x^-$ : molecules with higher and lower reward scores, respectively.
- 2)  $\pi_{Prior}(x)$ : probability of generating molecule  $x$  under the pretrained prior model.
- 3)  $\pi_{Agent}(x)$ : probability of generating molecule  $x$  under the current agent model.
- 4)  $\beta$ : a temperature scaling parameter controlling the strength of the preference signal
- 5)  $\sigma(\cdot)$ : the sigmoid function, mapping preference margins to likelihoods

This objective minimizes the probability that the agent assigns higher relative preference to lower-reward molecules, thus aligning the agent's trajectory distribution with the ranking induced by the reward function. Unlike value-based or advantage-weighted approaches, DPO directly optimizes pairwise preferences without needing scalar advantage estimation, making it more robust in noisy or sparse reward settings. To ensure the chemical validity of generated molecules, DPO includes a prior-policy constraint that regularizes the policy's deviation from the pretrained distribution. This prevents the agent from drifting too far from the chemically meaningful space.

Table S13. Key hyperparameter settings for DPO reinforcement learning

| Parameter   | Value |
|-------------|-------|
| Random seed | 101   |

|                                  |        |
|----------------------------------|--------|
| Num environments                 | 128    |
| Total SMILES                     | 20000  |
| Model type                       | gpt2   |
| Learning rate                    | 0.0001 |
| Epsilon                          | 1e-08  |
| Weight decay                     | 0.0    |
| Beta (preference scaling factor) | 1      |
| Number of mini-batches           | 1      |
| Number of training epochs        | 1      |

---

601

### 602 2.4.3 Reinforcement Learning Performance Comparison

603 To comprehensively evaluate the performance of different reinforcement learning  
604 strategies in molecular generation, we adopt the following metrics based on 20,000  
605 molecules generated per task :

- 606 1) Max Score: The highest reward value among all generated molecules, representing  
607 the upper bound of model performance for the task-specific objective.
- 608 2) Top-100 Mean: The average reward score of the top 100 molecules, measuring  
609 how concentrated the generated samples are in the high-performing region.
- 610 3) Top-100 SAscore: The mean Synthetic Accessibility (SA) score of the top 100  
611 molecules. A higher SA score generally reflects lower synthetic accessibility,  
612 indicating structures that may be more difficult to synthesize.<sup>8</sup>
- 613 4) Validity Rate: The proportion of generated SMILES that can be successfully  
614 parsed into valid molecular graphs using RDKit. This metric reflects the structural  
615 correctness of the generated molecules.
- 616 5) Unique Count (molecule): The proportion of structurally unique molecules among  
617 all valid molecules, indicating molecular-level diversity.
- 618 6) Unique Count (scaffold): The proportion of distinct Bemis–Murcko scaffolds

- among valid molecules, reflecting diversity at the scaffold (core structure) level.
- 7) Novelty Count (molecule): The proportion of valid molecules that are not present in the pretraining dataset, measuring novelty at the molecular level.
- 8) Novelty Count (scaffold): The proportion of scaffolds in valid molecules that are absent from the pretraining dataset, assessing the model’s ability to explore novel chemotypes.

Table S14. Detailed Metric Values for RF + GPT-2 under Different RL Algorithms

| <b>Metric</b>               | <b>REINVENT</b> | <b>REINFORCE</b> | <b>DPO</b> | <b>PPO</b> | <b>A2C</b> | <b>AHC</b> |
|-----------------------------|-----------------|------------------|------------|------------|------------|------------|
| Max Score                   | 2.026           | 2.032            | 1.715      | 1.614      | 1.717      | 2.02       |
| Top100 Mean                 | 2.024           | 2.019            | 1.649      | 1.568      | 1.506      | 2.02       |
| Top100 SAscore              | 6.1678          | 6.7343           | 5.6194     | 3.6469     | 5.1681     | 7.0601     |
| Validity Rate               | 0.9477          | 0.9475           | 0.9665     | 0.9308     | 0.9043     | 0.9107     |
| Unique Count<br>(molecule)  | 0.9434          | 0.9199           | 0.6118     | 0.8583     | 0.9973     | 0.8288     |
| Unique Count<br>(scaffold)  | 0.0705          | 0.048            | 0.0227     | 0.002      | 0.2123     | 0.036      |
| Novelty Count<br>(molecule) | 0.9644          | 0.9605           | 0.6185     | 0.9115     | 0.8907     | 0.9837     |
| Novelty Count<br>(scaffold) | 0.1622          | 0.074            | 0.0049     | 0.0005     | 0.091      | 0.0231     |

626

Table S15. Detailed Metric Values for RF + REINVENT under Different Generators

| <b>Metric</b>  | <b>GPT-2</b> | <b>LLaMA-2</b> | <b>GRU</b> | <b>LSTM</b> |
|----------------|--------------|----------------|------------|-------------|
| Max Score      | 2.026        | 2.032          | 1.961      | 1.972       |
| Top100 Mean    | 2.024        | 2.025          | 1.771      | 1.764       |
| Top100 SAscore | 6.1678       | 6.0836         | 5.5043     | 5.4053      |
| Validity Rate  | 0.9477       | 0.9718         | 0.9835     | 0.9853      |
| Unique Count   | 0.9434       | 0.8288         | 0.9038     | 0.9244      |



|               |        |        |        |        |
|---------------|--------|--------|--------|--------|
| (molecule)    |        |        |        |        |
| Unique Count  | 0.0705 | 0.0984 | 0.1014 | 0.1112 |
| (scaffold)    |        |        |        |        |
| Novelty Count | 0.9644 | 0.943  | 0.9345 | 0.906  |
| (molecule)    |        |        |        |        |
| Novelty Count | 0.1622 | 0.1448 | 0.0409 | 0.0449 |
| (scaffold)    |        |        |        |        |

628

629 Table S16. Metric Comparison of RF + REINVENT + GPT-2 Trained with Varying  
630 Pretraining Dataset Sizes

| Metric         | 100w    | 75w    | 50w    | 25w    | 10w    |
|----------------|---------|--------|--------|--------|--------|
| Max Score      | 2.026   | 2.032  | 2.026  | 1.809  | 1.657  |
| Top100 Mean    | 2.024   | 2.025  | 2.024  | 1.758  | 1.636  |
| Top100 SAscore | 6.1678  | 6.2542 | 5.9454 | 7.1173 | 6.7015 |
| Validity Rate  | 0.9477  | 0.9447 | 0.9464 | 0.9565 | 0.9577 |
| Unique Count   |         |        |        |        |        |
| (molecule)     | 0.9434  | 0.9217 | 0.9563 | 0.8936 | 0.8898 |
| Unique Count   |         |        |        |        |        |
| (scaffold)     | 0.0705  | 0.1002 | 0.0654 | 0.0142 | 0.0103 |
| Novelty Count  |         |        |        |        |        |
| (molecule)     | 0.9644  | 0.982  | 0.9717 | 0.967  | 0.9654 |
| Novelty Count  |         |        |        |        |        |
| (scaffold)     | 0.16s22 | 0.1405 | 0.0938 | 0.0049 | 0.0068 |

631

## 632 3 Results Analysis

### 633 3.1 Efficiency and Molecular Visualization

634 Table S17. Efficiency Comparison of Reinforcement Learning Algorithms

| REINVENT | REINFORCE | DPO | PPO | A2C | AHC |
|----------|-----------|-----|-----|-----|-----|
|----------|-----------|-----|-----|-----|-----|

635

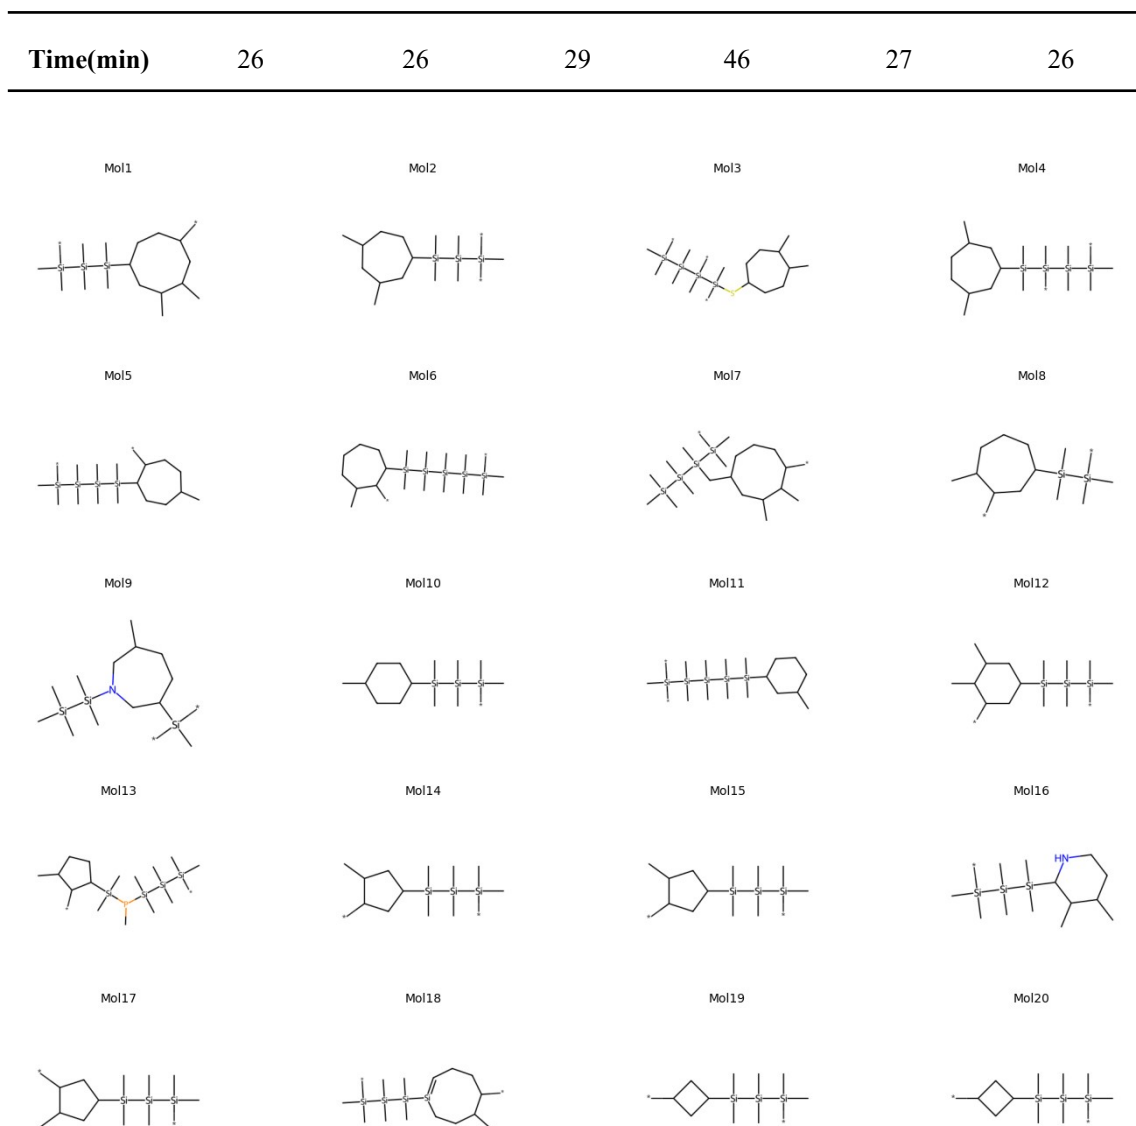

636

637 Figure S12. Visualization of Molecules Surpassing the Robeson Upper Bound

638

639 **3.2 SHAP Analysis**640 **3.2.1 Method**

## 641 (a) Molecular Feature Selection

642 To identify structural features that significantly influence model predictions, we  
 643 employ the Extended Connectivity Fingerprint (ECFP) method to encode all molecules  
 644 and apply statistical filtering based on the training dataset to select representative  
 645 substructures.

646 Specifically, we extract the SMILES representations from the training set and

647 convert them into molecular graphs using RDKit. We then compute Morgan  
648 fingerprints with a radius of 3 for each molecule and extract the non-zero bit identifiers  
649 (bit IDs) along with their counts. By aggregating all bit IDs across the dataset, we obtain  
650 a unique set of substructures and save it as a numbered DataFrame. This file records  
651 the mapping between each substructure (bit ID) and its corresponding feature index,  
652 serving as a critical reference for reverse-mapping high-contribution features identified  
653 during the subsequent SHAP analysis.

654 Next, we encode each molecule into a fixed-length vector according to the  
655 established bit ID order, resulting in a sparse fingerprint matrix. To reduce dimensional  
656 redundancy and improve training efficiency, we analyze the proportion of zeros in each  
657 bit position and retain only frequently occurring substructures. In this study, we select  
658 114 high-frequency features, forming a compact and informative subset of molecular  
659 descriptors used for interpretability analysis.

#### 660 (b) SHAP

661 We apply the SHAP (SHapley Additive exPlanations) method to perform feature  
662 attribution for the model.<sup>9</sup> Based on the Shapley value theory from cooperative game  
663 theory, SHAP quantifies the marginal contribution of each input feature to the model's  
664 prediction, thereby enabling interpretability analysis. In this study, we use the feature  
665 matrix of high-performance molecules as input samples and employ the TreeExplainer  
666 module to interpret a trained random forest model. SHAP values are computed  
667 separately for the two prediction targets (CO<sub>2</sub> and N<sub>2</sub>). Each structural fragment (bit  
668 position) receives a SHAP value vector, indicating its influence distribution across all  
669 samples. To assess the overall importance of each feature, we calculate the mean  
670 absolute SHAP value for each bit and use it as a quantitative measure of feature  
671 contribution. The features are then ranked accordingly to identify the most influential  
672 structural fragments.

#### 673 (c) Structural Visualization

674 To intuitively illustrate how the top-ranked structural features identified by SHAP  
675 analysis influence molecular architecture, we further highlight the specific functional  
676 groups or atomic fragments corresponding to these high-contribution features. Before

677 visualization, we first map each feature index back to its original bit\_id using the  
678 previously saved feature mapping table. Based on this, we select a set of representative  
679 molecules from the high-performance subset that contain the target bit\_id. Specifically,  
680 for each SMILES entry, RDKit is used to generate all active fingerprint bits and identify  
681 whether the current molecule includes the target bit\_id. If the feature is present, we  
682 further extract the corresponding atom indices and visualize the molecular structure  
683 using RDKit's MolDraw2D tool, highlighting the relevant atoms.

684 It is worth noting that the same bit\_id in ECFP fingerprints may correspond to  
685 different atomic environments across molecules. Therefore, the highlighted regions do  
686 not represent a fixed functional group structure, but rather the local fragment patterns  
687 that this feature denotes in different molecular contexts.

688

### 689 3.2.2 Result

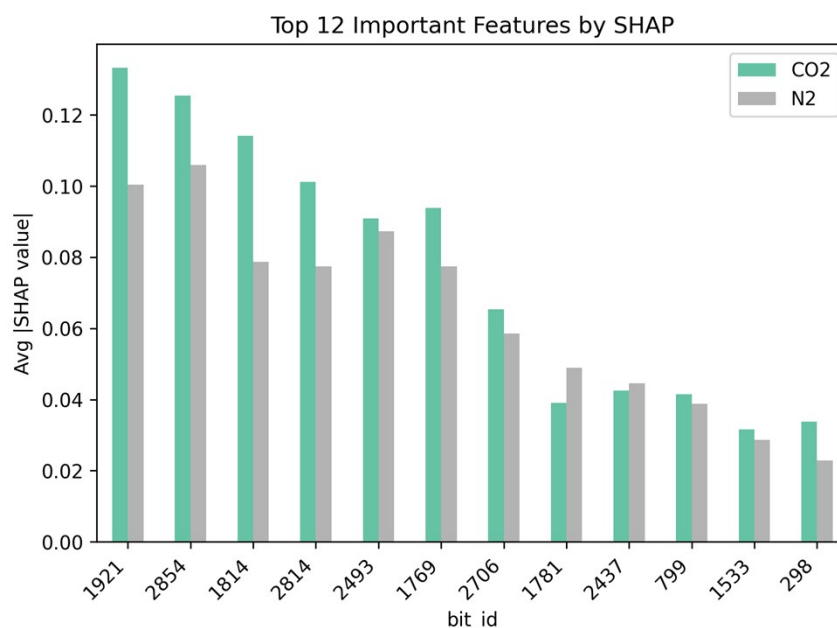

690

691 Figure S13. Top 12 Important Molecular Features Identified by SHAP Analysis

692

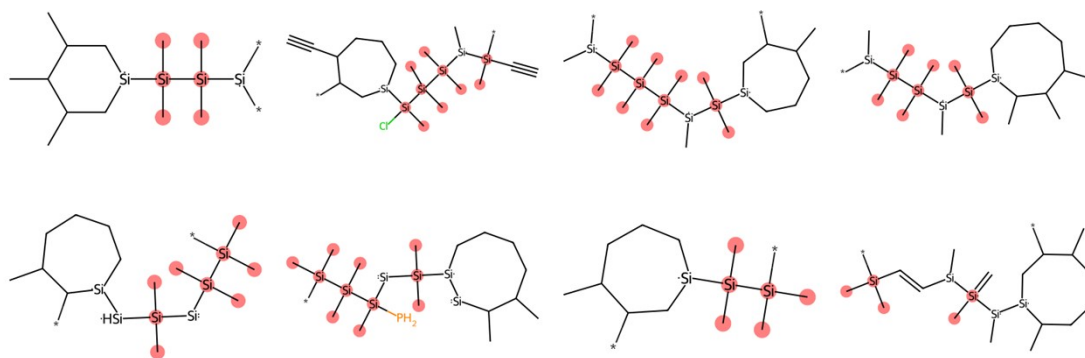

693  
 694 Figure S14. Visualization of the Molecular Substructure Corresponding to Bit ID 1921  
 695

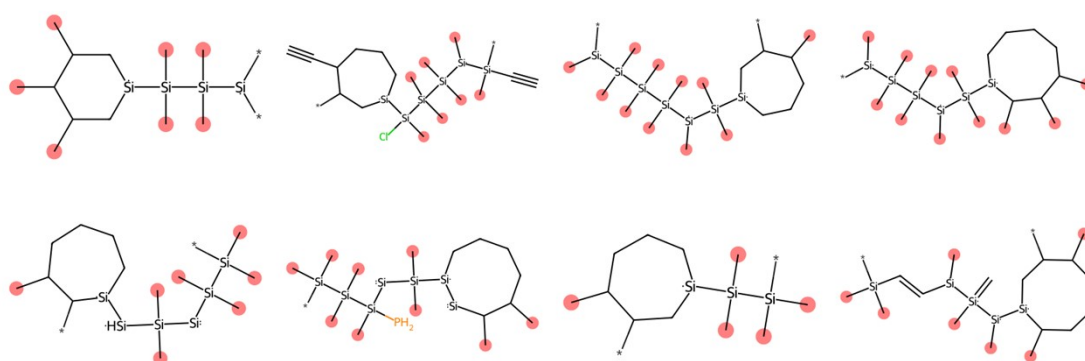

696  
 697 Figure S15. Visualization of the Molecular Substructure Corresponding to Bit ID 2854  
 698

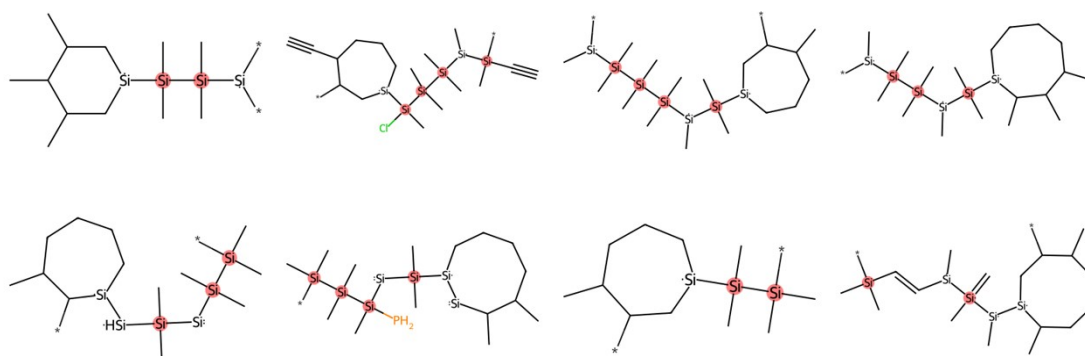

699  
 700 Figure S16. Visualization of the Molecular Substructure Corresponding to Bit ID 1814  
 701

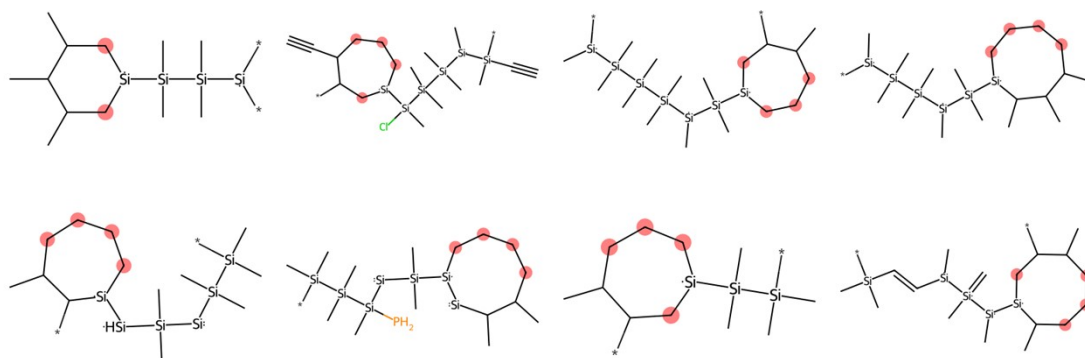

702  
703 Figure S17. Visualization of the Molecular Substructure Corresponding to Bit ID 2814  
704

### 705 3.3 Molecular Dynamics Simulation Setting

706 To evaluate the gas separation performance of polymer structures recommended  
707 by reinforcement learning, this study establishes a systematic molecular dynamics  
708 (MD) simulation workflow.<sup>10</sup> All simulations are performed using the GROMACS and  
709 LAMMPS platforms. The OPLS-AA all-atom force field is employed to accurately  
710 model intermolecular interactions, ensuring the physical reliability of the results.

711 The SMILES representations of polymer repeating units generated by  
712 reinforcement learning are first converted into three-dimensional structures. Single-  
713 chain polymers are constructed using RDKit, and file format conversion as well as  
714 stereochemical standardization is conducted using Open Babel. The polymer chains are  
715 embedded in a cubic simulation box, with periodic boundary conditions applied along  
716 the backbone direction to construct infinitely repeating linear polymer structures.

717 Before production simulations, the system undergoes energy minimization to  
718 remove geometric distortions and relieve initial stress. This is followed by a thermal  
719 annealing step to allow the polymer chains to relax into stable conformations. Thermal  
720 equilibration is conducted in two stages: a 0.5 ns NVT simulation at 500 K to stabilize  
721 the temperature, followed by a 0.5 ns NPT (constant-pressure, constant-temperature)  
722 simulation at 500 K and 1 bar to equilibrate system density and volume.

723 To estimate the glass transition temperature ( $T_g$ ), the system is cooled from 500 K  
724 to 250 K under NPT conditions, with the temperature decreased in 50 K intervals.  
725 Equilibrium densities are collected at each temperature point, and  $T_g$  is determined by

726 identifying the inflection point in the density–temperature curve.

727 After thermodynamic equilibration of the polymer matrix, target gas molecules  
728 (CO<sub>2</sub> and N<sub>2</sub>) are inserted under infinite dilution conditions to assess their solubility and  
729 diffusivity within the polymer. The system is further equilibrated under NVT conditions  
730 at 300 K for 1 ns and under NPT conditions at 1 atm for 2 ns. A 50 ns production  
731 simulation is then performed to record the trajectories of the gas molecules.

732 Based on the trajectory data, the following key performance metrics are calculated:

733 **Diffusion Coefficient (D):**

734 The diffusion coefficient is calculated from the slope of the mean squared  
735 displacement (MSD) curve of gas molecules, using the following equation:

736 
$$D = \lim_{t \rightarrow \infty} \frac{1}{6t} \langle |\vec{r}(t) - \vec{r}(0)|^2 \rangle$$

737 Where:

738  $\vec{r}(t)$  is the position vector of a gas molecule at time t

739  $\langle \cdot \rangle$  denotes the statistical average over all gas molecules

740 the coefficient 6 arises from diffusion in three-dimensional space (for two dimensions,  
741 the coefficient would be 4).

742

743 **Solubility (S):**

744 Solubility is calculated via Widom insertion to obtain Henry coefficients, cross-  
745 checked on a subset with low-loading GCMC.

746 The solubility coefficient  $S$  quantifies the equilibrium concentration of gas molecules  
747 dissolved in a polymer matrix under a given pressure and is inversely proportional to  
748 the Henry constant  $k_H$ :

749 
$$S = \frac{1}{k_H}$$

The Henry coefficient  $k_H$  is related to the excess chemical potential by

750 
$$k_H = \frac{1}{RT} \exp\left(\frac{\mu^{ex}}{RT}\right)$$

751 At infinite dilution,  $k_H$  is evaluated using the Widom test particle insertion method,  
 752 which estimates the excess chemical potential  $\mu^{ex}$  of a single gas molecule in the  
 753 polymer phase.

754 In the canonical (NVT) ensemble,  $\mu^{ex}$  is expressed as:

$$\mu^{ex} = -k_B T \ln \langle \exp(-\frac{\Delta U}{k_B T}) \rangle$$

755

756 where  $\Delta U$  is the potential energy change upon inserting a test gas molecule into the  
 757 polymer matrix,  $k_B$  is the Boltzmann constant, and  $\langle \cdots \rangle$  denotes ensemble averaging  
 758 over equilibrium polymer configurations.

759

#### 760 **Permeability (P):**

761 Permeability is determined as the product of the diffusion coefficient and solubility,  
 762 expressed as:

$$763 \quad P = D * S$$

764 with the unit of Barrer.

#### 765 **Finite-size analysis:**

766 We simulated box sizes (35 nm; constant density) for representative polymers.

767

### 768 **3.4 Evaluation of Generated Polymers via Molecular Dynamics Simulation**

769 To mitigate this issue and provide a more balanced validation, we have adopted a score-  
 770 based stratified sampling approach to examine the consistency between model  
 771 predictions and MD-calculated results. Specifically, we sampled 12 polymers across  
 772 three different predicted score ranges (0.5, 1.0, and 1.5; 10 polymers each, where a  
 773 score of 2.0 corresponds to the Robeson upper bound) and performed MD simulations  
 774 for each subset.

775 As illustrated in Figure S18, the MD-calculated results are in reasonable agreement  
 776 with the model predictions to a certain extent. This alignment indicates that the model  
 777 exhibits sufficient accuracy to describe the actual material properties. Notably, the MD-



778 calculated scores for the three polymer clusters show a gradual upward trend—with the  
 779 cluster corresponding to the highest predicted score also achieving the highest MD-  
 780 calculated value, while the cluster with the lowest predicted score yields the lowest  
 781 MD-calculated result.

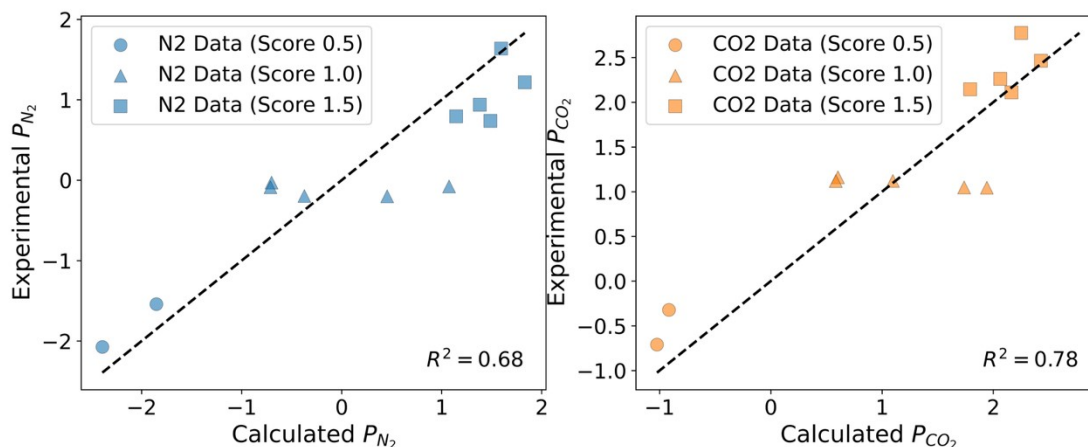

782  
 783 Figure S18. Comparison Between MD-Calculated Results and Model Predictions for  
 784 Polymers Sampled Across Three Predicted Score Ranges (0.5, 1.0, 1.5)  
 785

### 786 3.5 Benchmarking the Molecular Dynamics Simulation with Experimental 787 Dataset

788 To further validate our MD calculations against experimental results, we have  
 789 performed additional MD simulations for 47 representative polymer systems from the  
 790 experimental dataset and compared the calculated values with their experimental labels.  
 791 As shown in Figure S19, the results from the molecular dynamics calculations are in  
 792 reasonable agreement with the labels of the experimental dataset to a certain extent.  
 793 This consistency reflects the effectiveness of our molecular dynamics calculation  
 794 workflow, confirming that the established computational framework can reliably  
 795 reproduce key properties of the polymer systems.

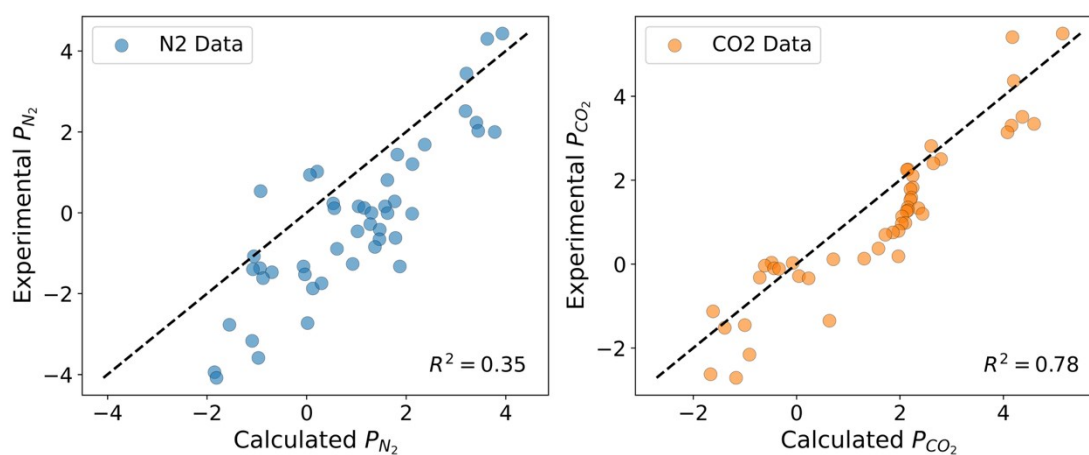

796

797 Figure S19. Comparison Between MD-Calculated Values and Experimental Labels for  
 798 47 Representative Polymer Systems

799 **Reference**

- 800 [1] J. Yang, L. Tao, J. He, J. R. McCutcheon and Y. Li, *Science Advances*, **8**, eabn9545.  
801 [2] R. Ma and T. Luo, *Journal of Chemical Information and Modeling*, 2020, **60**, 4684-  
802 4690.  
803 [3] V. Varshney, S. S. Patnaik, A. K. Roy and B. L. Farmer, *Macromolecules*, 2008,  
804 **41**, 6837-6842.  
805 [4] D. Rogers and M. Hahn, *Journal of Chemical Information and Modeling*, 2010, **50**,  
806 742-754.  
807 [5] L. Tao, V. Varshney and Y. Li, *Journal of Chemical Information and Modeling*,  
808 2021, **61**, 5395-5413.  
809 [6] A. Bou, M. Thomas, S. Dittert, C. Navarro, M. Majewski, Y. Wang, S. Patel, G.  
810 Tresadern, M. Ahmad, V. Moens, W. Sherman, S. Sciabola and G. De Fabritiis, *Journal*  
811 *of Chemical Information and Modeling*, 2024, **64**, 5900-5911.  
812 [7] P. Ertl and A. Schuffenhauer, *Journal of Cheminformatics*, 2009, **1**, 8.  
813 [8] C. Rudin, *Nat Mach Intell*, 2019, **1**, 206-215.  
814 [9] R. M. Venable, A. Krämer and R. W. Pastor, *Chem Rev*, 2019, **119**, 5954-5997.
